# Supplementary material for: Biomimetic synthesis of needle-like fluorescent calcium phosphate/carbon dot hybrid composites for cell labeling and copper ion detection
Source: Royal Society of Chemistry journal article supplement (doi:10.1039/c6dt00395h), 2016-01-01
Supplement: c6dt00395h1.pdf [file c6dt00395h1.pdf]

## Supplementary material

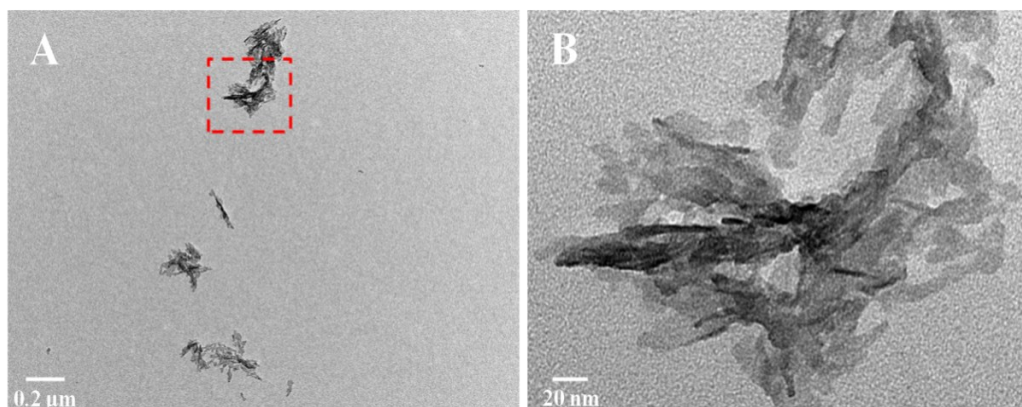

**Fig.S1.** TEM images with low (A) and high (B) magnification of CaP.

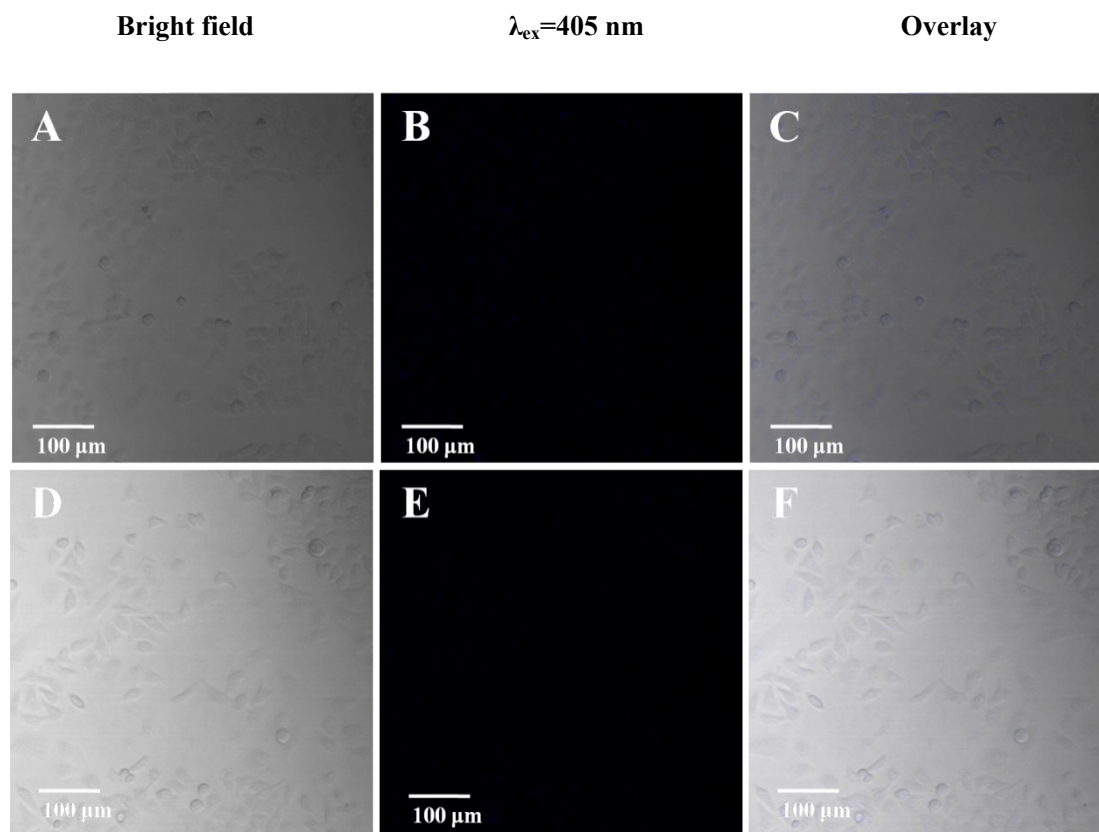

**Fig.S2.** CLSM images of HeLa cells (A–C) With CDs (200 μg mL<sup>-1</sup>), and (D–F) Without CDs.

Scale bars: 100 μm.
